# Supplementary material for: A lead bromide organic–inorganic hybrid perovskite material showing reversible dual phase transition and robust SHG switching
Source: Royal Society of Chemistry journal article supplement (doi:10.1039/d2dt01040b), 2022-01-01
Supplement: d2dt01040b1.pdf [file d2dt01040b1.pdf]

A lead bromide organic-inorganic hybrid perovskite material showing  
reversible dual phase transition and robust SHG switching

Keke Han, Zhenhong Wei\*, Xing Ye, Bo Li, Pan Wang, Hu Cai\*

School of Chemistry and Chemical Engineering, Nanchang University, Nanchang,

330031, P. R. China

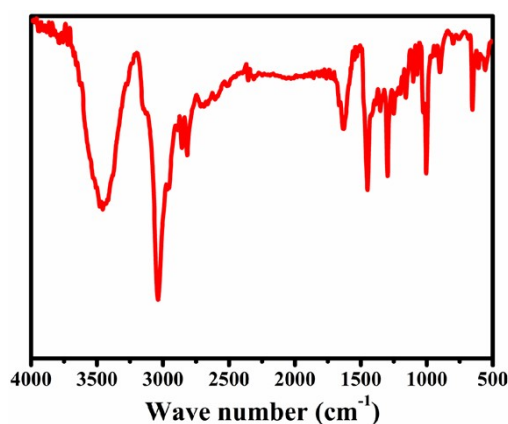

Fig. S1 Infrared (IR) spectra of solid **1** in KBr pellet recorded at room temperature.

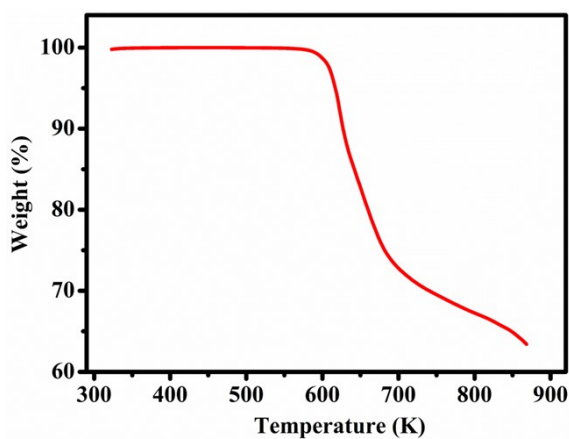

Fig. S2. TGA curves of compound **1** at heating rate of 40 °C /min, under nitrogen atmosphere.

## Methodology

## Powder X-ray diffraction

---

The variable-temperature powder X-ray diffraction (PXRD) measurements were performed on a Rigaku D/MAX 2000 PC X-ray diffractometer. PXRD patterns were recorded in the  $2\theta$  range of  $0^{\circ}$ – $50^{\circ}$  with a step size of  $0.02^{\circ}$ .

### **Thermal measurements**

Differential scanning calorimetry (DSC) measurements were carried out on a Perkin-Elmer Diamond DSC instrument by heating and cooling the polycrystalline samples over the temperature range 300–480 K with the rate of 20 K/min at atmospheric pressure in aluminum crucibles

### **Dielectric Measurements**

The temperature-dependent dielectric constant was measured on the Tonghui TH2828A instrument using silver-coated pressed powder pellets as electrodes, under the conditions of an applied electric field of 1V, a temperature range of 300K to 450K, at frequencies of 500 Hz to 1 MHz.

### **SHG measurements.**

SHG switching experiments were performed on powder samples using an Nd:YAG laser (1064 nm, Vibrant 355 II, OPOTEK) with an input pulse of 350 mV on a FLS 920 (Edinburgh Instruments) at a scan rate of  $10\text{ K min}^{-1}$ . The numerical value of the nonlinear optical coefficient of SHG was determined by comparison with the reference value of potassium dihydrogen phosphate (KDP).

**Tab. S1.** Selected bond lengths (Å) and angles (°) of **1** at 293 K, 398 K and 443 K.

| 293 K                                     |           | 398 K                                     |            | 443 K                                     |          |
|-------------------------------------------|-----------|-------------------------------------------|------------|-------------------------------------------|----------|
| Pb1 - Br3 <sup>1</sup>                    | 3.225 (8) | Pb1 - Br2 <sup>1</sup>                    | 3.025(2)   | Pb1 - Br1 <sup>1</sup>                    | 3.010(9) |
| Pb1 - Br3                                 | 2.926 (7) | Pb1 - Br2                                 | 3.025(2)   | Pb1 - Br1 <sup>2</sup>                    | 3.010(9) |
| Pb1 - Br2 <sup>2</sup>                    | 3.232 (8) | Pb1 - Br1                                 | 3.032(2)   | Pb1 - Br1 <sup>3</sup>                    | 3.010(9) |
| Pb1 - Br2                                 | 2.860 (8) | Pb1 - Br1 <sup>1</sup>                    | 3.032(2)   | Pb1 - Br1 <sup>4</sup>                    | 3.010(9) |
| Pb1 - Br1                                 | 2.955 (8) | Pb1 - Br3 <sup>2</sup>                    | 3.0378(19) | Pb1 - Br1                                 | 3.010(9) |
| Pb1 - Br1 <sup>1</sup>                    | 3.096 (8) | Pb1 - Br3                                 | 3.0378(19) | Pb1 - Br1 <sup>5</sup>                    | 3.010(9) |
| Br3 - Pb1 - Br3 <sup>1</sup>              | 170.7 (2) | Pb2 - Br4 <sup>3</sup>                    | 3.022(2)   | Br1 <sup>1</sup> - Pb1 - Br1 <sup>2</sup> | 180.0    |
| Br3 - Pb1 - Br2 <sup>2</sup>              | 81.48(2)  | Pb2 - Br4                                 | 3.022(2)   | Br1 <sup>2</sup> - Pb1 - Br1              | 98.4(2)  |
| Br3 <sup>1</sup> - Pb1 - Br2 <sup>2</sup> | 106.0(19) | Pb2 - Br5                                 | 3.028(2)   | Br1 <sup>1</sup> - Pb1 - Br1 <sup>3</sup> | 98.4(2)  |
| Br3 - Pb1 - Br1                           | 85.75(2)  | Pb2 - Br5 <sup>3</sup>                    | 3.028(2)   | Br1 - Pb1 - Br1 <sup>3</sup>              | 98.4(2)  |
| Br3 - Pb1 - Br1 <sup>1</sup>              | 94.88(2)  | Pb2 - Br6 <sup>3</sup>                    | 3.0448(19) | Br1 <sup>4</sup> - Pb1 - Br1              | 180.0    |
| Br2 - Pb1 - Br3                           | 90.54(2)  | Pb2 - Br6                                 | 3.0448(19) | Br1 - Pb1 - Br1 <sup>5</sup>              | 81.6(2)  |
| Br2 - Pb1 - Br3 <sup>1</sup>              | 82.60(2)  | Br1 - Pb1 <sup>4</sup>                    | 3.032(2)   | Br1 <sup>1</sup> - Pb1 - Br1 <sup>5</sup> | 81.6(2)  |
| Br2 - Pb1 - Br2 <sup>2</sup>              | 169.5(3)  | Br2 - Pb1 <sup>4</sup>                    | 3.025(2)   | Br1 <sup>1</sup> - Pb1 - Br1 <sup>4</sup> | 98.4(2)  |
| Br2 - Pb1 - Br1                           | 90.03(2)  | Br3 - Pb1 <sup>5</sup>                    | 3.0378(19) | Br1 <sup>4</sup> - Pb1 - Br1 <sup>5</sup> | 98.4(2)  |
| Br2 - Pb1 - Br1 <sup>1</sup>              | 86.72(2)  | Br4 - Pb2 <sup>6</sup>                    | 3.022(2)   | Br1 <sup>2</sup> - Pb1 - Br1 <sup>5</sup> | 98.4(2)  |
| Br1 - Pb1 - Br3 <sup>1</sup>              | 100.4(2)  | Br5 - Pb2 <sup>6</sup>                    | 3.028(2)   | Br1 <sup>3</sup> - Pb1 - Br1 <sup>5</sup> | 180.0    |
| Br1 <sup>1</sup> - Pb1 - Br3 <sup>1</sup> | 78.51(19) | Br6 - Pb2 <sup>7</sup>                    | 3.0448(19) | Br1 <sup>2</sup> - Pb1 - Br1 <sup>4</sup> | 81.6(2)  |
| Br1 - Pb1 - Br2 <sup>2</sup>              | 82.70(2)  | Br2 <sup>1</sup> - Pb1 - Br2              | 179.69(16) | Br1 <sup>2</sup> - Pb1 - Br1 <sup>3</sup> | 81.6(2)  |
| Br1 <sup>1</sup> - Pb1 - Br2 <sup>2</sup> | 100.6(2)  | Br2 <sup>1</sup> - Pb1 - Br1              | 99.34(9)   | Br1 <sup>4</sup> - Pb1 - Br1 <sup>3</sup> | 81.6(2)  |
| Br1 - Pb1 - Br1 <sup>1</sup>              | 176.6(2)  | Br2 - Pb1 - Br1                           | 80.45(9)   | Br1 <sup>1</sup> - Pb1 - Br1              | 81.6(2)  |
| Pb1 - Br3 - Pb1 <sup>2</sup>              | 79.39(16) | Br2 <sup>1</sup> - Pb1 - Br1 <sup>1</sup> | 80.45(9)   | Pb1 <sup>6</sup> - Br1 - Pb1              | 82.1(3)  |
| Pb1 - Br2 - Pb1 <sup>1</sup>              | 80.22(16) | Br2 - Pb1 - Br1 <sup>1</sup>              | 99.34(9)   |                                           |          |
| Pb1 - Br1 - Pb1 <sup>2</sup>              | 81.10(17) | Br1 - Pb1 - Br1 <sup>1</sup>              | 96.16(13)  |                                           |          |
|                                           |           | Br2 <sup>1</sup> - Pb1 - Br3 <sup>2</sup> | 97.11(7)   |                                           |          |
|                                           |           | Br2 - Pb1 - Br3 <sup>2</sup>              | 83.09(7)   |                                           |          |
|                                           |           | Br1 - Pb1 - Br3 <sup>2</sup>              | 81.59(8)   |                                           |          |
|                                           |           | Br1 <sup>1</sup> - Pb1 - Br3 <sup>2</sup> | 176.41(11) |                                           |          |

---

|                                           |            |
|-------------------------------------------|------------|
| Br2 <sup>1</sup> - Pb1 - Br3              | 83.09(7)   |
| Br2 - Pb1 - Br3                           | 97.11(7)   |
| Br1 - Pb1 - Br3                           | 176.40(11) |
| Br1 <sup>1</sup> - Pb1 - Br3              | 81.59(8)   |
| Br3 <sup>2</sup> - Pb1 - Br3              | 100.80(9)  |
| Br4 <sup>3</sup> - Pb2 - Br4              | 180.00(7)  |
| Br4 <sup>3</sup> - Pb2 - Br5              | 96.53(8)   |
| Br4 - Pb2 - Br5                           | 83.47(8)   |
| Br4 <sup>3</sup> - Pb2 - Br5 <sup>3</sup> | 83.47(8)   |
| Br4 - Pb2 - Br5 <sup>3</sup>              | 96.53(8)   |
| Br5 - Pb2 - Br5 <sup>3</sup>              | 180.0      |
| Br4 <sup>3</sup> - Pb2 - Br6 <sup>3</sup> | 99.25(8)   |
| Br4 - Pb2 - Br6 <sup>3</sup>              | 80.75(8)   |
| Br5 - Pb2 - Br6 <sup>3</sup>              | 80.88(7)   |
| Br5 <sup>3</sup> - Pb2 - Br6 <sup>3</sup> | 99.12(7)   |
| Br4 <sup>3</sup> - Pb2 - Br6              | 80.75(8)   |
| Br4 - Pb2 - Br6                           | 99.25(8)   |
| Br5 - Pb2 - Br6                           | 99.12(7)   |
| Br5 <sup>3</sup> - Pb2 - Br6              | 80.88(7)   |
| Br6 <sup>3</sup> - Pb2 - Br6              | 180.00(13) |
| Pb1 - Br1 - Pb1 <sup>4</sup>              | 81.85(7)   |
| Pb1 - Br2 - Pb1 <sup>4</sup>              | 82.09(7)   |
| Pb1 - Br3 - Pb1 <sup>5</sup>              | 81.67(6)   |
| Pb2 <sup>6</sup> - Br4 - Pb2              | 82.19(7)   |
| Pb2 - Br5 - Pb2 <sup>6</sup>              | 81.99(7)   |
| Pb2 <sup>7</sup> - Br6 - Pb2              | 81.44(6)   |

---

**Tab. S2** Hydrogen bond lengths [ $\text{\AA}$ ] and angles [ $^\circ$ ] of **1** at 293 K.

---

| D-H...A  | D-H [ $\text{\AA}$ ] | H...A [ $\text{\AA}$ ] | D...A [ $\text{\AA}$ ] | D-H...A [ $^\circ$ ] |
|----------|----------------------|------------------------|------------------------|----------------------|
| N-H...Br | 0.910                | 2.442                  | 163.93                 | 3.326                |

---
